# Supplementary material for: KNO3-Assisted incorporation of K dopants and N defects into g-C3N4 with enhanced visible light driven photocatalytic H2O2 production
Source: Royal Society of Chemistry journal article supplement (doi:10.1039/d1nj04682a), 2021-01-01
Supplement: d1nj04682a1.pdf [file d1nj04682a1.pdf]

## Supporting Information

### **KNO<sub>3</sub>-assisted incorporation of K dopants and N defects into g-C<sub>3</sub>N<sub>4</sub> with enhanced visible light driven photocatalytic H<sub>2</sub>O<sub>2</sub> production**

Haihua Yang,<sup>a,b</sup> Xiaorong Qian,<sup>a,b</sup> Na Zhang,<sup>c</sup> Li Zhang,<sup>a,b</sup> and Minjie Zhou<sup>\*a,b</sup>

*<sup>a</sup> Key Laboratory of Hunan Province for Advanced Carbon-Based Functional Materials, Hunan Institute of Science and Technology, Yueyang, Hunan Province, 414006, P.R. China*

*<sup>b</sup> School of Chemistry and Chemical Engineering, Hunan Institute of Science and Technology, Yueyang, Hunan Province, 414006, P.R. China*

*<sup>c</sup> School of Physics and Electronic Science, Hunan Institute of Science and Technology, Yueyang, Hunan Province, 414006, P.R. China*

\*Corresponding Author. E-mail: zmj0104@163.com

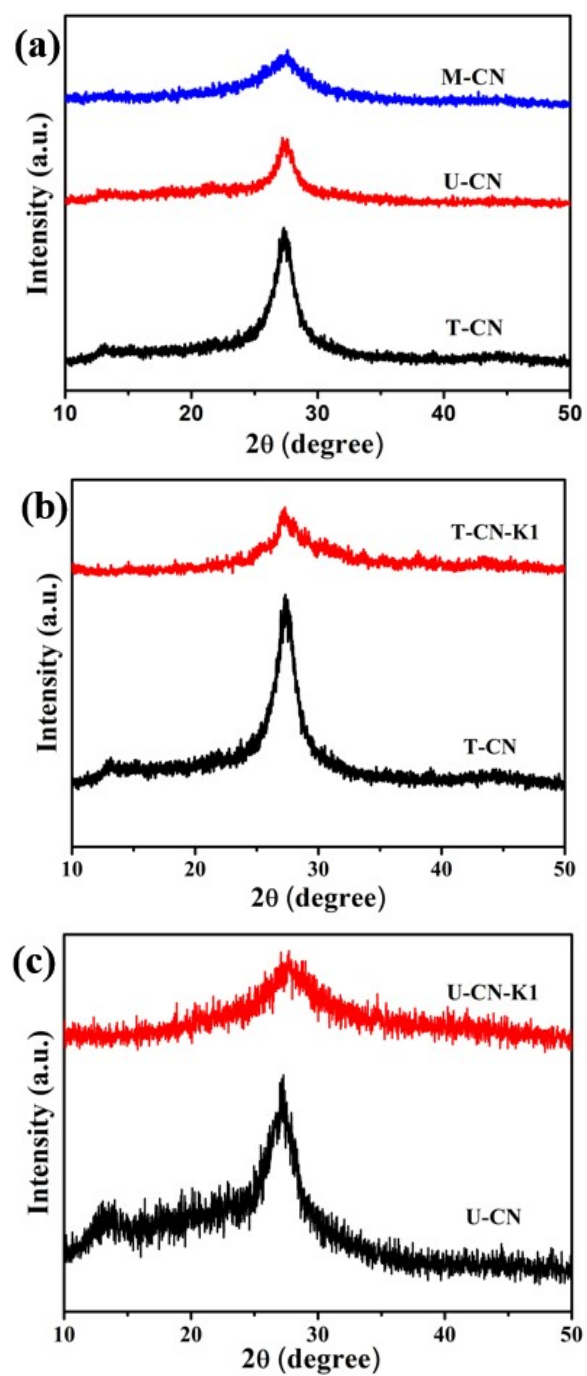

Figure S1. XRD patterns of the pristine and modified g-C<sub>3</sub>N<sub>4</sub> samples.

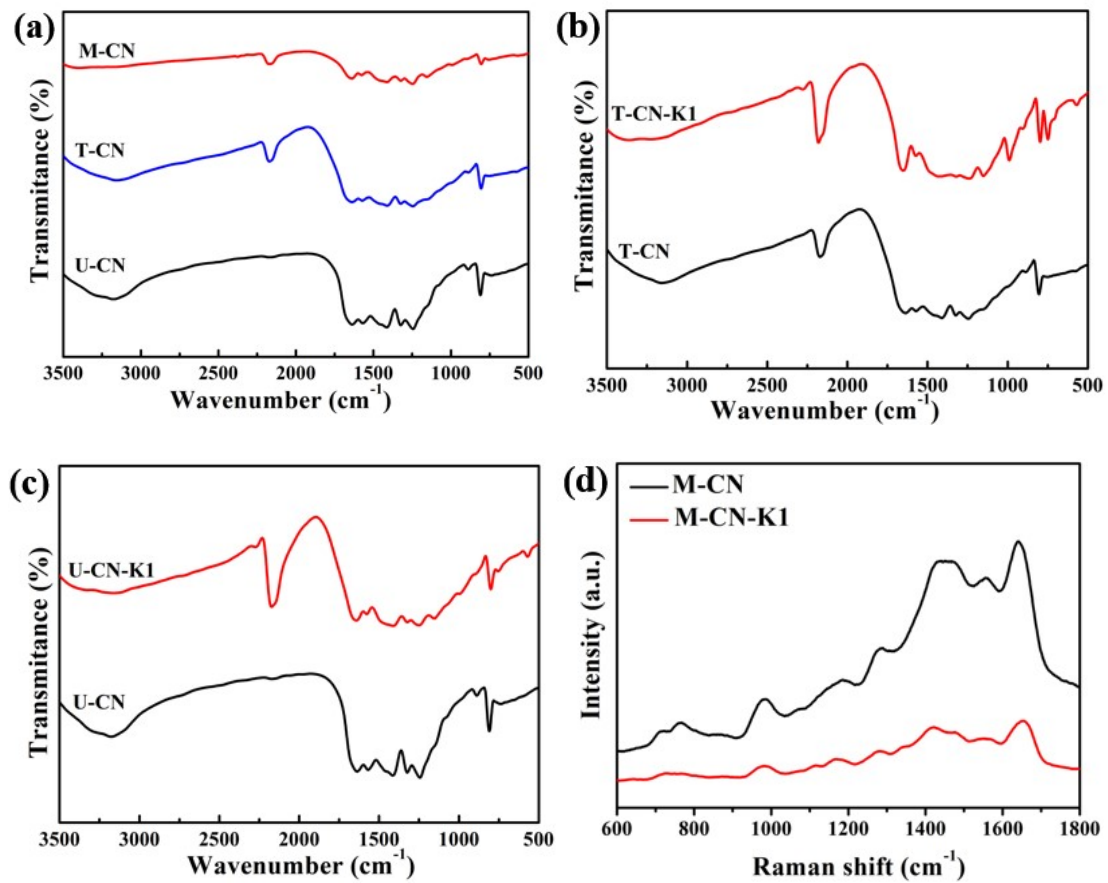

Figure S2. (a-c) FT-IR spectra and Raman spectra (d) of the pristine and modified g-C<sub>3</sub>N<sub>4</sub> samples.

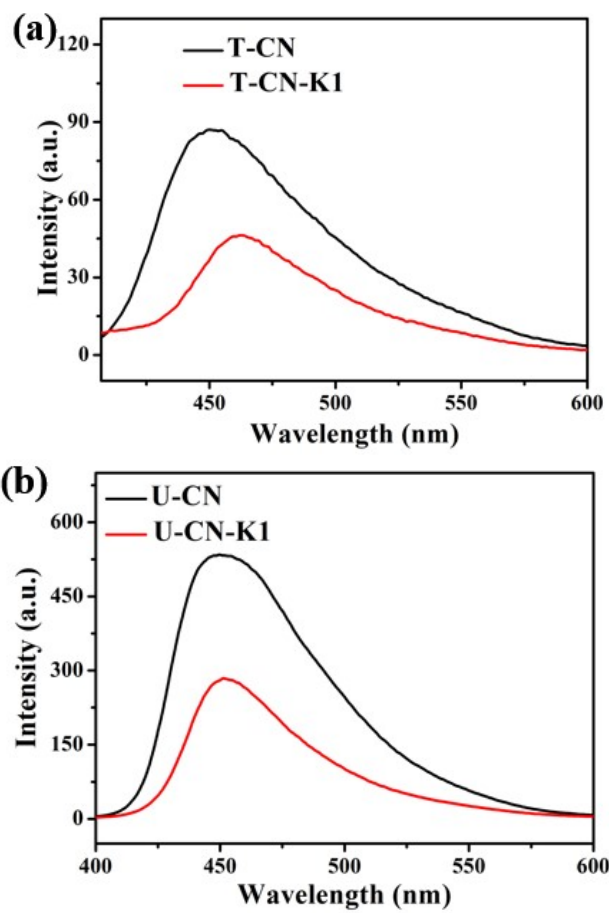

Fig. S3. Steady-state PL emission spectra of the pristine CN and CN-K1.

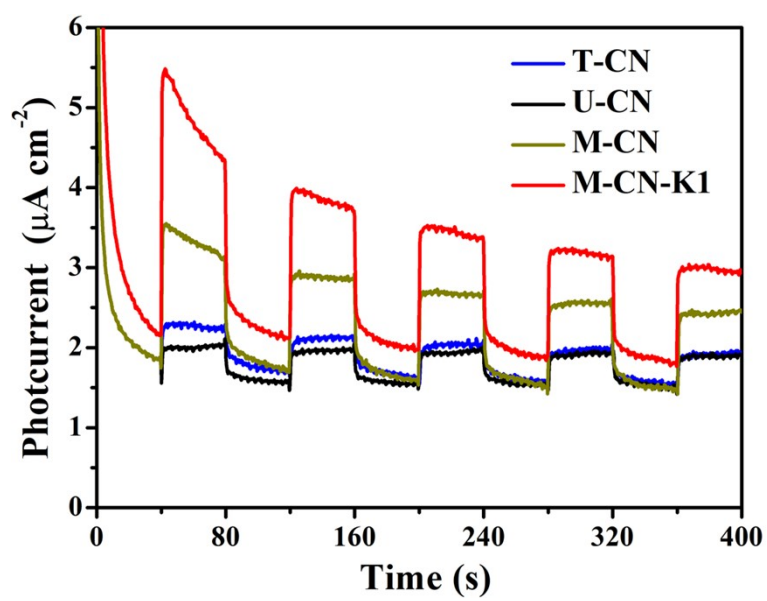

Fig. S4. Photocurrent responses of pristine and modified g-C<sub>3</sub>N<sub>4</sub> photocatalysts.

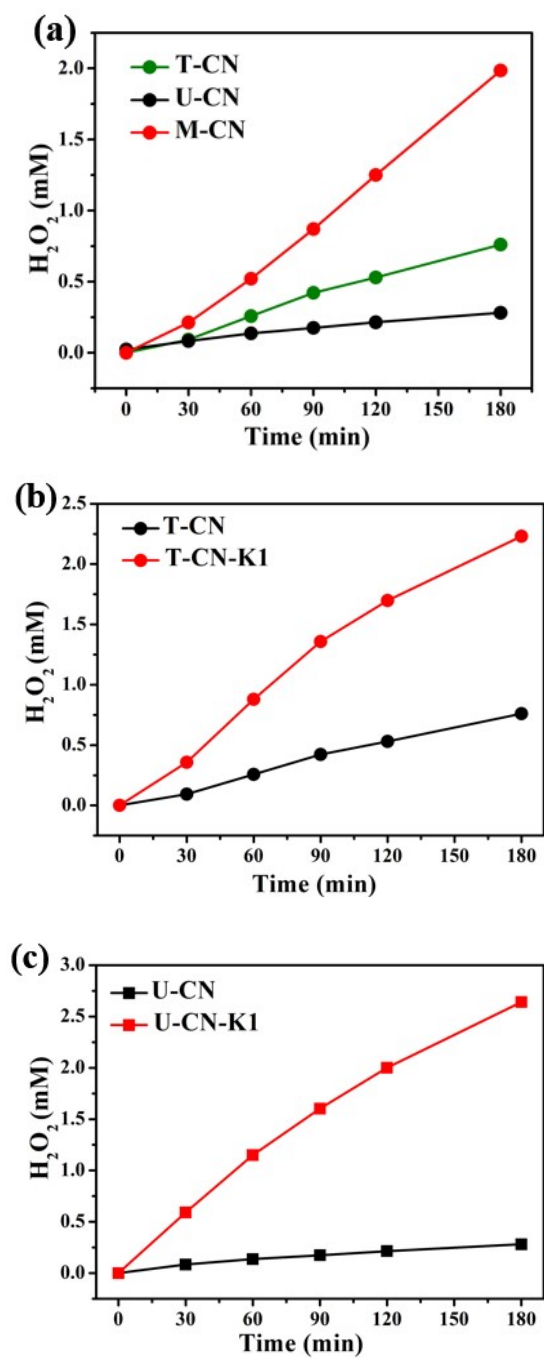

Fig. S5. Time profiles of photocatalytic  $\text{H}_2\text{O}_2$  production by pristine and modified  $\text{g-C}_3\text{N}_4$  photocatalysts under visible light irradiation.

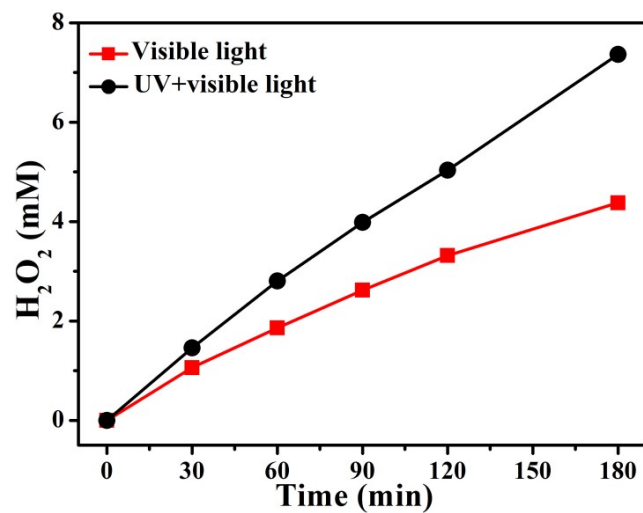

Fig. S6. Comparison of photocatalytic H<sub>2</sub>O<sub>2</sub> production by M-CN-K1 under UV+visible and visible light irradiation, respectively.

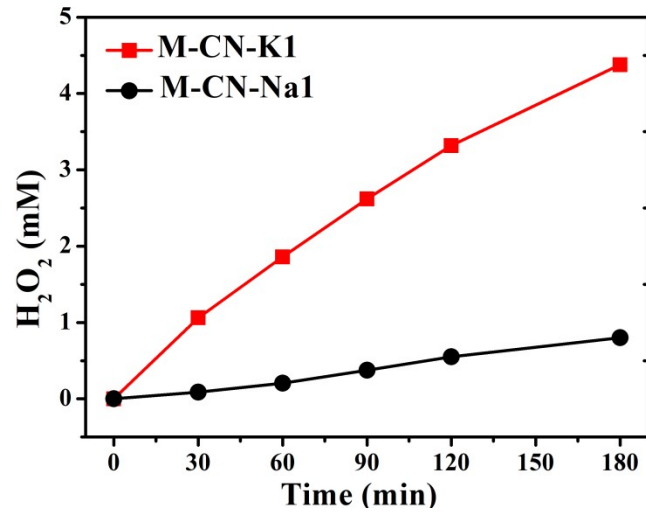

Fig. S7. Comparison of visible light driven photocatalytic  $H_2O_2$  production by M-CN-K1 and M-CN-Na1, respectively.



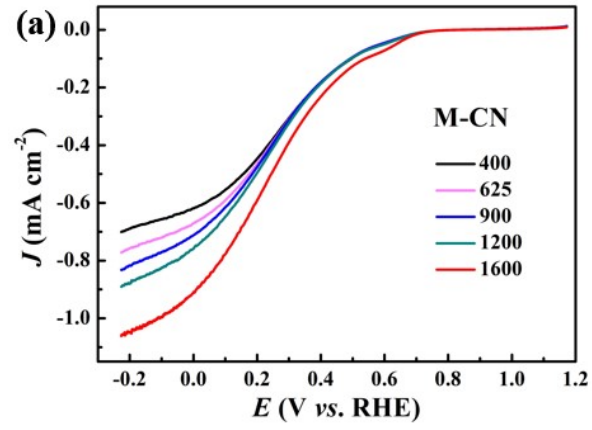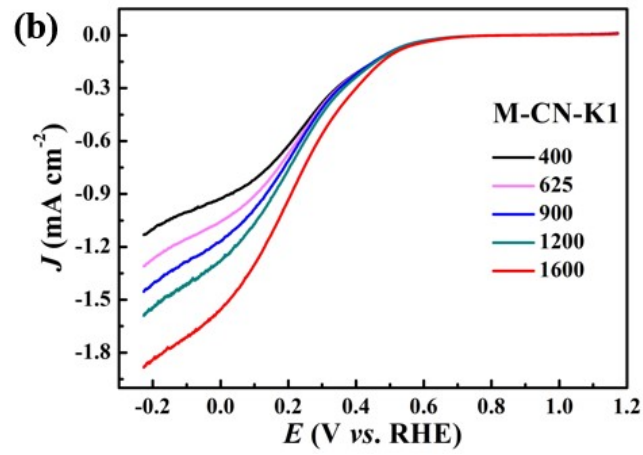

Fig. S8. LSV curves of M-CN (a) and M-CN-K1 (b) measured on RDE at different rotating speeds.

Table S1. Elemental composition of M-CN and M-CN-K1

| Catalyst | C (at %) | N (at %) | K (at %) | O (at %) |
|----------|----------|----------|----------|----------|
| M-CN     | 42.1     | 53.3     | 0        | 4.6      |
| M-CN-K1  | 43.6     | 51.1     | 1.1      | 4.2      |
